# Supplementary material for: Oxidative Stress Markers in Inflammatory Bowel Diseases: Systematic Review
Source: PubMed Central journal article supplement (PMC7459713; doi:10.3390/diagnostics10080601), 2020-08-17
Supplement: diagnostics-10-00601-s001.pdf [file diagnostics-10-00601-s001.pdf]

## Supplementary materials

**Table S1.** Prooxidants/oxidative stressors as potential biomarkers in inflammatory bowel diseases

| Analyte                 | Type   | Disease | Evaluated population <sup>1</sup>                                                                                   | Findings <sup>2</sup>                                                                                                                                                                                                             | Potential                                            | Ref.  |
|-------------------------|--------|---------|---------------------------------------------------------------------------------------------------------------------|-----------------------------------------------------------------------------------------------------------------------------------------------------------------------------------------------------------------------------------|------------------------------------------------------|-------|
| Arg (mRNA)              | 1 T-E  | CD, UC  | FFPE slides: 25 CD (10); 38 UC (21); 25 HC                                                                          | ↓ in aCD vs. HC; ↑ in aUC vs. iUC and HC; ↑ in aUC vs. aCD                                                                                                                                                                        | aCD marker<br>aUC marker<br>Diff <sub>aCD/aUC</sub>  | [29]  |
| Cu                      | BS     | IBD     | 19 UC (aa/RI, ns); 16 CD (aa/ CDAI <sub>≥</sub> 150); 30 HC                                                         | ↑ in IBD in females                                                                                                                                                                                                               | aIBD marker<br>in females                            | [25]  |
| COX2 (mRNA)             | T-E    | CD, UC  | FFPE slides: 25 CD (10); 38 UC (21); 25 HC                                                                          | ↑ in aCD vs. iCD and HC; ↑ in aUC vs. iUC and HC                                                                                                                                                                                  | aIBD marker<br>IBD activity                          | [29]  |
| NOS2 (mRNA)             | T-E    | CD, UC  | FFPE slides: 25 CD (10); 38 UC (21); 25 HC                                                                          | ↑ in aCD vs. iCD and HC<br>↑ in aUC vs. iUC and HC                                                                                                                                                                                | aIBD marker<br>IBD activity                          | [29]  |
| NOX2 (mRNA)             | T-E    | CD, UC  | FFPE slides: 25 CD (10); 38 UC (21); 25 HC                                                                          | ↑ in aCD vs. iCD and HC<br>↑ in aUC vs. iUC and HC                                                                                                                                                                                | aIBD marker<br>IBD activity                          | [29]  |
| PP (StP)                | BP     | CD      | 52 CD (37/CDAI <sub>≥</sub> 150); 99 HC                                                                             | ↓ in aCD vs. iCD and HC; CDAI -0.54; CRP -0.54; IL-6 -0.57; Chol 0.70; TG 0.52                                                                                                                                                    | CD activity                                          | [45]  |
| NO                      | saliva | CD      | 28 CD (ns/CDAI, ns); 20 HC                                                                                          | ↑ in CD                                                                                                                                                                                                                           | CD marker                                            | [17]  |
| IoFRP                   | T-H    | CD      | 45 CD (aa/ns); 30 IBS; IS                                                                                           | ↑ in CD vs. IBS                                                                                                                                                                                                                   | Diff <sub>CD/IBS</sub>                               | [110] |
| RoPRG                   | T-H    | CD      | 45 CD (aa/ns); 30 IBS; IS                                                                                           | ↑ in CD vs. IBS                                                                                                                                                                                                                   | Diff <sub>CD/IBS</sub>                               | [110] |
| StP                     | T-H    | CD      | 45 CD (aa/ns); 30 IBS; IS                                                                                           | ↑ in CD vs. IBS                                                                                                                                                                                                                   | Diff <sub>CD/IBS</sub>                               | [110] |
| DUOX2 (E.C. 1.6.3.1)    | T-M    | CD, UC  | 25 pediatric CD (aa/PCDAI, ns); 22 pediatric UC (aa/PUCAI, ns); 24 GIS                                              | ↑ in UC in AsC (22×), DeC (12.5×), and TI (13.5×) <sup>3</sup>                                                                                                                                                                    | Diff <sub>CD/UC</sub>                                | [106] |
| LOX15 (E.C. 1.13.11.33) | T-M    | CD, UC  | 25 pediatric CD (aa/PCDAI, ns); 22 pediatric UC (aa/PUCAI, ns); 24 GIS                                              | ↑ in UC in AsC (25×), DeC (13×), and TI (18×) <sup>3</sup>                                                                                                                                                                        | Diff <sub>CD/UC</sub>                                | [106] |
| LOX5 (E.C. 1.13.11.34)  | T-M    | CD, UC  | 25 pediatric CD (aa/PCDAI, ns); 22 pediatric UC (aa/PUCAI, ns); 24 GIS                                              | ↑ in IBD vs. GIS; (8.2× in AsC, 9× in DesC, 11.6× in TI) <sup>3</sup>                                                                                                                                                             | Diff <sub>IBD/GIS</sub>                              | [106] |
| NOS2 (E.C. 1.14.13.39)  | T-M    | CD, UC  | 25 pediatric CD (aa/PCDAI, ns); 22 pediatric UC (aa/PUCAI, ns); 24 GIS                                              | ↑ in IBD vs. GIS (16.3× in AsC, 9.5× in DesC, 5.3× in TI) <sup>3</sup><br>↑ in UC in AsC (3.5×), DeC (3×), and TI (2.7×) <sup>3</sup>                                                                                             | Diff <sub>IBD/GIS</sub><br>Diff <sub>CD/UC</sub>     | [106] |
| Cu                      | BW     | IBD     | 167 IBD (132; CDAI <sub>≥</sub> 150 or CAI>5; 100 CD and 67 UC); 45 HC                                              | ↑ in aIBD vs. HC<br>↑ in aIBD vs. iIBD                                                                                                                                                                                            | IBD marker<br>IBD activity                           | [24]  |
| NO                      | saliva | CD, UC  | 16 CD (ns); 16 UC (ns); 16 HC                                                                                       | ↑ in CD vs. HC; ↑ in UC vs. HC                                                                                                                                                                                                    | IBD marker                                           | [16]  |
| NO                      | T-H    | CD, UC  | 22 UC (15/ ns), paired biopsies inf. & non-infl. colon (n=6 aUC); 11 CD (6/ns); 14 specific colitis (infl.); 10 GIS | ↑ in aUC and iUC vs. GIS; ↑ in aCD and iCD vs. GIS; ↑ in spec. colitis vs. GIS;<br>↑ in aUC/aCD vs. iUC/iCD<br>↑ in infl. and non-infl. aUC vs. iUC and GIS;<br>If stratified by severity into: GIS/iIBD/miIBD/moIBD/sIBD, r=0.81 | IBD marker<br>IBD activity<br>Dif <sub>IBD/GIS</sub> | [19]  |
| TOC                     | BS     | CD, UC  | 40 CD (ns/CDAI, ns); 40 UC (ns/RI-EAI, ns); 80 HC                                                                   | ↑ in CD and UC vs. HC; CDAI 0.96; RI-EAI 0.93                                                                                                                                                                                     | IBD marker<br>MI                                     | [20]  |
| NOS2                    | T-I    | UC      | 16 aUC; 14 UC+N (9 D, 14 UCAC); 17 NM                                                                               | ↑ in aUC and UC+N vs. NM                                                                                                                                                                                                          | Inflam./N                                            | [30]  |

|                      |        |        |                                                               |                                                                                  |               |           |      |
|----------------------|--------|--------|---------------------------------------------------------------|----------------------------------------------------------------------------------|---------------|-----------|------|
| (E.C. 1.14.13.39)    |        |        |                                                               |                                                                                  |               |           |      |
| Cu                   | BP     | CD, UC | 20 CD (ns); 20 UC (ns); 50 HC                                 | n/a; CRP <sup>4</sup> 0.86                                                       |               | none      | [26] |
| OSI                  | BP     | IBD    | 71 pediatric IBD (47/PCDAI or PUCAI; 35 CD and 36 UC); 29 GIS | No association                                                                   |               | none      | [22] |
| TOC                  | BP     | IBD    | 71 pediatric IBD (47/PCDAI or PUCAI; 35 CD and 36 UC); 29 GIS | No association                                                                   |               | none      | [22] |
| MPO (E.C. 1.11.2.2.) | BS     | UC     | 30 UC (aa/TW, ns); 30 HC                                      | ↑ in UC; n/a with severity, CRP, ESR                                             | in UC         | UC marker | [27] |
| NO                   | saliva | UC     | 37 UC (aa/TW, ns); 15 HC                                      | ↑ in UC; age 0.38; n/a with activity, extent, treatment                          |               | UC marker | [18] |
| OSI                  | BP     | UC     | 20 UC (11/RI, ns); 20 HC                                      | ↑ in UC; n/a with UC activity; CRP 0.41; ESR 0.54                                |               | UC marker | [23] |
| TOC                  | BP     | UC     | 20 UC (11/RI, ns); 20 HC                                      | ↑ in UC; n/a with UC activity; CRP 0.42; ESR 0.42                                |               | UC marker | [23] |
| SMO (E.C. 1.5.3.16)  | T-H    | UC     | mRNA: 51 UC & 14 NM; IHC: 53 UC & 16 NM; MDAI                 | ↑ in UC (immune cells; IHC); ↑ immunoreactivity with severity: MDAI 0.65, EA, HA | in UC (mRNA); | UC marker | [28] |

<sup>1</sup>, number of patients (number of patients with active disease/scoring system  $\geq$  cut-off for active disease); <sup>2</sup>, data presented as  $\uparrow$  increased or  $\downarrow$  decreased levels between indicated groups and as correlation coefficients preceded by the variable; <sup>3</sup>, data showing fold change in expression and analyzed separately for three bowel fragments: AsC=ascending colon, DeS=descending colon, TI=terminal ileum; <sup>4</sup> correlation in CD patients; ns, not specified; aa, all active; n/a, no association; inflam., inflamed; NO, nitric oxide; MPO, myeloperoxidase; SMO, spermine oxidase; COX2, inducible cyclooxygenase; NOX2, NADPH oxidase; NOS2, inducible NO synthase; LOX, lipoxygenase; DUOX2, dual oxidase 2; Arg 1, arginase 1; TOC, total oxidant capacity; OSI, oxidative stress index calculated as total oxidant capacity/total antioxidant status; IoFRP, intensity of free radical processes determined as sum of spontaneous chemiluminescence; RoPRG, rate of peroxide radical generation; PP, peroxidation potential; StP, susceptibility to undergo peroxidation; Cu, copper; HS, healthy controls; CD, Crohn's disease; UC, ulcerative colitis; IBD, inflammatory bowel diseases; iIBD, inactive IBD; miIBD, mild IBD; moIBD, moderate IBD; sIBD, severe IBD; aCD, active CD; iCD, inactive CD; aUC, active UC; iUC, inactive UC; N, neoplasms; D, dysplasia; NM, normal mucosa; UCAC, UC-associated cancer, GIS, non-IBD patients with gastrointestinal symptoms; IBS, irritable bowel syndrome; MI, mucosal inflammation; Diff<sub>CD/UC</sub>; differential marker for CD and UC; Diff<sub>iIBD/GIS</sub>; differential marker for IBD and GIS; Diff<sub>CD/IBS</sub>; differential marker for CD and IBS; Diff<sub>aCD/aUC</sub>; differential marker for aCD and aUC; CDAI, Crohn's disease activity index, CAI, colitis activity index; MDAI, Mayo disease activity index; PCDAI, pediatric Crohn's disease activity index; PUCAI, pediatric ulcerative colitis index; RI-EAI, Rachmilewitz endoscopic activity index; RI, Rachmilewitz index; TW, Truelove-Witt index; HA, histopathological activity; ES, endoscopic activity; FFPE, formalin-fixed paraffin-embedded; ESR, erythrocyte sedimentation rate; Chol, total cholesterol; TG, triglycerides; IS, interventional study; T-I, tissue-based marker determined with immunohistochemistry (IHC); T-E, tissue-based marker analyzed as mRNA expression; T-M, tissue metaproteomics – aspirates collected from mucosal-luminal interface for the analysis of microbial and human proteins; BS, blood-based marker determined in serum; BE, blood-based marker determined in erythrocytes; BP, blood-based marker determined in plasma; BW, blood-based marker determined in whole blood; T-H, tissue-based marker determined in homogenates.

**Table S2.** Enzymatic antioxidants as potential biomarkers in inflammatory bowel diseases

| Analyte                          | Type | Disease | Evaluated population <sup>1</sup>                          | Findings <sup>2</sup>                                              | Potential    | Ref. |
|----------------------------------|------|---------|------------------------------------------------------------|--------------------------------------------------------------------|--------------|------|
| PON1 <sub>P</sub> (E.C. 3.1.8.1) | BS   | UC      | 30 UC (aa/TW, ns); 30 HC                                   | $\downarrow$ in UC; n/a with activity                              | UC marker    | [48] |
| PON1 <sub>P</sub> (E.C. 3.1.8.1) | BS   | UC      | 66 UC (MDAI: mild $\leq$ 5advanced); 24 HC                 | n/a; CRP as indep. pred. of PON1 <sub>P</sub>                      | none         | [46] |
| PON1 <sub>A</sub> (E.C. 3.1.1.2) | BS   | UC      | 66 UC (MDAI: mild $\leq$ 5advanced); 24 HC                 | $\downarrow$ in UC; MDAI and WBC indep. pred. of PON1 <sub>A</sub> | UC marker    | [46] |
| GPx (E.C. 1.11.1.9)              | BP   | CD      | 37 CD (26/CDAI $\geq$ 150); 37 HC                          | No associations                                                    | none         | [43] |
| GPx (E.C. 1.11.1.9)              | BS   | IBD     | 14 CD (8/CDAI $\geq$ 150); 27 UC (13/MDAI $\geq$ 4); 18 HC | $\downarrow$ in iIBD vs. aIBD and HC                               | IBD activity | [38] |
| GPx (E.C. 1.11.1.9)              | BP   | CD      | 47 CD (25/CDAI $\geq$ 150); 25 HC                          | No association                                                     | none         | [42] |

|                                     |        |        |                                                                                |                                                                                               |                           |       |
|-------------------------------------|--------|--------|--------------------------------------------------------------------------------|-----------------------------------------------------------------------------------------------|---------------------------|-------|
| GPx<br>(E.C. 1.11.1.9)              | saliva | CD     | 47 CD (25/CDAI $\geq$ 150); 25 HC                                              | No association                                                                                | none                      | [42]  |
| GPx<br>(E.C. 1.11.1.9)              | BE     | IBD    | 91 IBD (43/CDAI & TW); 45 HC                                                   | No associations                                                                               | none                      | [34]  |
| GPx<br>(E.C. 1.11.1.9)              | BE     | CD     | 15 pediatric CD (ai/PCDAI, $\geq$ 10); 15 HC; IS                               | n/a; PCDAI: -0.46                                                                             | CD activity               | [33]  |
| GPx<br>(E.C. 1.11.1.9)              | BS     | IBD    | 30 IBD (CDAI & LI); 30 HC                                                      | $\uparrow$ in IBD; CAL 0.55                                                                   | IBD marker                | [40]  |
| GPx<br>(E.C. 1.11.1.9)              | BP     | CD, UC | 35 UC (13/RI, ns); 12 CD (6/HBI, ns); 30 HC                                    | $\uparrow$ in aCD and iCD vs. HC; $\uparrow$ in aUC and iUC vs. HC                            | IBD marker                | [39]  |
| GPx<br>(E.C. 1.11.1.9)              | BP     | CD     | 43 CD (16/CDAI, $>$ 150); 15 HC                                                | $\uparrow$ in aCD vs. HC                                                                      | aCD marker                | [41]  |
| GPx<br>(E.C. 1.11.1.9)              | BL     | CD     | 25 adult CD (ns/CDAI $\geq$ 150); 88 HC; 21 pediatric CD (ns/PCDAI, ns); 11 HC | n/a; PCDAI -0.51                                                                              | CD activity               | [35]  |
| GPx<br>(E.C. 1.11.1.9)              | T-E    | IBD    | 12 CD (ns); 12 UC (ns)                                                         | $\uparrow$ in infl. vs. non-infl.                                                             | MI                        | [118] |
| GPx<br>(E.C. 1.11.1.9)              | T-H    | CD     | 20 CD (18 infl. and 14 non-infl.); 16 NM                                       | $\downarrow$ in infl. vs. non-infl. and NM                                                    | MI                        | [83]  |
| mGPx<br>(E.C. 1.11.1.9)             | T-M    | CD, UC | 25 pediatric CD (aa/PCDAI, ns); 22 pediatric UC (aa/PUCAI, ns); 24 GIS         | $\uparrow$ in IBD vs. GIS; 4 $\times$ (AsC), 14 $\times$ (DeC), 11 $\times$ (TI) <sup>3</sup> | Diff <sub>IBD/GIS</sub>   | [106] |
| CAT<br>(E.C. 1.11.1.6)              | BE     | CD     | 15 pediatric CD (ai/PCDAI, $\geq$ 10); 15 HC; IS                               | No associations                                                                               | none                      | [33]  |
| CAT<br>(E.C. 1.11.1.6)              | BE     | UC     | 81 UC (ns/AI $\geq$ 150); 85 HC                                                | $\uparrow$ in UC vs. HC; n/a with activity                                                    | UC marker                 | [32]  |
| CAT<br>(E.C. 1.11.1.6)              | T-H    | CD, UC | 12 CD (ns/ HBI $\geq$ 8) 5 UC (ns/ MDAI $\geq$ 6); 12 HC                       | No associations                                                                               | none                      | [44]  |
| CAT<br>(E.C. 1.11.1.6)              | BS     | IBD    | 30 IBD (CDAI & LI); 30 HC                                                      | $\uparrow$ in IBD; CAL 0.52                                                                   | IBD marker                | [40]  |
| CAT<br>(E.C. 1.11.1.6)              | BL     | CD     | 25 aCD (HBI $\geq$ 5) $\rightarrow$ 19 rCD <sup>4</sup> ; 20 iCD; 25 HC        | $\downarrow$ in aCD, iCD, and rCD vs. HC                                                      | CD marker                 | [36]  |
| CAT<br>(E.C. 1.11.1.6)              | BL     | CD     | 58 CD (32/CDAI $\geq$ 150); 26 HC                                              | $\downarrow$ in aCD vs. iCD and HC                                                            | CD activity               | [37]  |
| CAT<br>(E.C. 1.11.1.6)              | BP     | CD, UC | 20 CD (ns); 20 UC (ns); 50 HC                                                  | No associations                                                                               | none                      | [26]  |
| SOD<br>(E.C. 1.15.1.1)              | BL     | CD     | 25 aCD (HBI $\geq$ 5) $\rightarrow$ 19 rCD; 20 iCD; 25 HC                      | $\uparrow$ in aCD vs. iCD, rCD, and HC                                                        | aCD marker<br>CD activity | [36]  |
| SOD<br>(E.C. 1.15.1.1)              | BE     | CD, UC | 93 UC (42/RI, ns) 81 CD (53/ CDAI $\geq$ 150); 105 HC                          | n/a; CDAI -0.29; ESR <sup>5</sup> -0.25                                                       | none                      | [31]  |
| SOD<br>(E.C. 1.15.1.1)              | BE     | CD     | 15 pediatric CD (ai/PCDAI, $\geq$ 10); 15 HC; IS                               | $\downarrow$ in CD; CAL -0.37                                                                 | CD marker                 | [33]  |
| SOD<br>(E.C. 1.15.1.1)              | BE     | UC     | 81 UC (ns/AI $\geq$ 150); 85 HC                                                | $\uparrow$ in UC vs. HC; n/a with activity                                                    | UC marker                 | [32]  |
| SOD<br>(E.C. 1.15.1.1)              | BE     | CD     | 25 adult CD (ns/CDAI $\geq$ 150); 88 HC; 21 pediatric CD (ns/PCDAI, ns); 11 HC | $\uparrow$ in adult CD vs. HC                                                                 | CD marker                 | [35]  |
| SOD<br>(E.C. 1.15.1.1)              | BS     | IBD    | 14 CD (8/ CDAI $\geq$ 150) 27 UC (13/ MDAI $\geq$ 4); 18 HC                    | $\downarrow$ in iIBD vs. aIBD and HC                                                          | IBD activity              | [38]  |
| SOD<br>(E.C. 1.15.1.1)              | BS     | IBD    | 19 UC (aa/RI, ns); 16 CD (aa/CDAI, $\geq$ 150); 30 HC                          | $\downarrow$ in IBD                                                                           | aIBD marker               | [25]  |
| SOD<br>(E.C. 1.15.1.1)              | BP     | CD     | 47 CD (25/CDAI $\geq$ 150); 25 HC                                              | $\downarrow$ in aCD vs. iCD and HC; CDAI -0.46; CRP -0.48                                     | CD activity               | [42]  |
| SOD<br>(E.C. 1.15.1.1)              | saliva | CD     | 47 CD (25/CDAI $\geq$ 150); 25 HC                                              | n/a; CRP 0.37                                                                                 | none                      | [42]  |
| SOD<br>(E.C. 1.15.1.1)              | BP     | CD, UC | 20 CD (ns); 20 UC (ns); 50 HC                                                  | n/a; CRP <sup>5</sup> 0.70                                                                    | none                      | [26]  |
| SOD <sup>6</sup><br>(E.C. 1.15.1.1) | T-H    | UC     | 20 UC (paired infl./ non-infl.); 4 HC (NM)                                     | $\uparrow$ in infl. vs. non-infl.                                                             | MI                        | [119] |

|                                        |     |        |                                                                        |                                                                                                                                                    |                                                  |       |
|----------------------------------------|-----|--------|------------------------------------------------------------------------|----------------------------------------------------------------------------------------------------------------------------------------------------|--------------------------------------------------|-------|
| SOD<br>(E.C. 1.15.1.1)                 | T-M | CD, UC | 25 pediatric CD (aa/PCDAI, ns); 22 pediatric UC (aa/PUCAL, ns); 24 GIS | ↑ in CD in DeC (2.1×) and in TI (4.8×), no difference in AsC <sup>3</sup>                                                                          | Diff <sub>CD/UC</sub>                            | [106] |
| Prdx4 <sup>6</sup><br>(E.C. 1.11.1.24) | T-H | UC     | 20 UC (paired infl./ non-infl.); 4 HC (NM)                             | ↑ in infl. vs. non-infl.                                                                                                                           | MI                                               | [119] |
| Prdx6 <sup>6</sup><br>(E.C. 1.11.1.24) | T-H | UC     | 20 UC (paired infl./ non-infl.); 4 HC (NM)                             | ↓ in infl. vs. non-infl.                                                                                                                           | MI                                               | [119] |
| Prdx2<br>(E.C. 1.11.1.24)              | T-M | CD, UC | 25 pediatric CD (aa/PCDAI, ns); 22 pediatric UC (aa/PUCAL, ns); 24 GIS | ↑ in UC in AsC (7.2×), DeC (1.8×) and TI (1.9×) <sup>3</sup>                                                                                       | Diff <sub>CD/UC</sub>                            | [106] |
| Prdx3 <sup>6</sup><br>(E.C. 1.11.1.24) | T-H | UC     | 20 UC (paired infl./ non-infl.); 4 HC (NM)                             | ↓ in infl. vs. non-infl.                                                                                                                           | MI                                               | [119] |
| Prdx3<br>(E.C. 1.11.1.24)              | T-M | CD, UC | 25 pediatric CD (aa/PCDAI, ns); 22 pediatric UC (aa/PUCAL, ns); 24 GIS | ↑ in CD in DeC (1.5×) and in TI (2.7×) and ↑ in UC in AsC (1.4×) <sup>3</sup>                                                                      | Diff <sub>CD/UC</sub>                            | [106] |
| FOCP & SEACP<br>(E.C. 1.16.3.1)        | BS  | CD     | 14 CD patients (aa/ CDAI, ns); 52 HC; IS                               | ↓ in aCD vs. HC                                                                                                                                    | aCD marker                                       | [55]  |
| CP <sub>P</sub>                        | BP  | CD, UC | 20 CD (ns); 20 UC (ns); 50 HC                                          | No association                                                                                                                                     | none                                             | [26]  |
| CP <sub>P</sub>                        | T-M | CD, UC | 25 pediatric CD (aa/PCDAI, ns); 22 pediatric UC (aa/PUCAL, ns); 24 GIS | ↑ in IBD vs. GIS; (46× in AsC, 29× in DeC, 37× in TI) <sup>3</sup> ;<br>↑ in CD in DeC (1.4×) and TI (5.7×) but ↑ in UC in AsC (6.2×) <sup>3</sup> | Diff <sub>IBD/GIS</sub><br>Diff <sub>CC/UC</sub> | [106] |

<sup>1</sup>, number of patients (number of patients with active disease/scoring system ≥ cut-off for active disease); <sup>2</sup>, data presented as ↑ increased or ↓ decreased levels between indicated groups and as correlation coefficients preceded by the variable; <sup>3</sup>, data showing fold change in expression and analyzed separately for three bowel fragments: AsC=ascending colon, DeS=descending colon, TI=terminal ileum; <sup>4</sup>, patients with active disease were followed until they have achieved remission; <sup>5</sup> correlation in CD patients; <sup>6</sup>, determined as protein using 2-dimensional gel electrophoresis (2-DGE)-based proteomics coupled with mass spectrometry; ns, not specified; aa, all active; ai, all inactive; n/a, no association; inflam., inflamed; indep. pred., independent predictor; PON1, paraoxonase-1 (A in superscript indicates the arylesterase activity and P – paraoxonase activity); GPx, glutathione peroxidase; mGPx, microbial GPx; CAT, catalase; SOD, superoxide dismutase; Prdx, thioredoxin-dependent peroxide reductase; FOCP, ferroxidase activity of ceruloplasmin; SEACP, specific activity of FOCP (ratio between ferroxidase activity and apoceruloplasmin); CP<sub>P</sub>, ceruloplasmin determined as protein; HS, healthy controls; CD, Crohn's disease; UC, ulcerative colitis; IBD, inflammatory bowel diseases; aIBD, active IBD; iIBD, inactive IBD; miIBD, mild IBD; moIBD, moderate IBD; sIBD, severe IBD; aCD, active CD; iCD, inactive CD; rCD, remission CD; aUC, active UC; iUC, inactive UC; N, neoplasms; D, dysplasia; NM, normal mucosa; UCAC, UC-associated cancer; GIS, non-IBD patients with gastrointestinal symptoms; MI, mucosal inflammation; Diff<sub>CD/UC</sub>; differential marker for CD and UC; Diff<sub>IBD/GIS</sub>; differential marker for IBD and GIS; CDAI, Crohn's disease activity index, MDAI, Mayo disease activity index; PCDAI, pediatric Crohn's disease activity index; PUCAL, pediatric ulcerative colitis index; RI, Rachmilewitz index; LI, Lichtiger index; HBI, Harvey-Bradshaw index; AI, activity index defined by authors in their paper; TW, Truelove-Witt index; CRP, C-reactive protein; ESR, erythrocyte sedimentation rate; CAL, fecal calprotectin; IS, interventional study; T-E, tissue-based marker analyzed as mRNA expression; T-M, tissue metaproteomics – aspirates collected from mucosal-luminal interface for the analysis of microbial and human proteins; BS, blood-based marker determined in serum; BE, blood –based marker determined in erythrocytes; BP, blood-based marker determined in plasma; BL, blood-based marker determined in leukocytes; T-H, tissue-based marker determined in homogenates

**Table S3.** Non-enzymatic protein antioxidants as potential markers in inflammatory bowel diseases

| Analyte | Type   | Disease | Evaluated population <sup>1</sup> | Findings <sup>2</sup>                  | Potential | Ref. |
|---------|--------|---------|-----------------------------------|----------------------------------------|-----------|------|
| F-SH    | saliva | CD      | 28 CD (ns/CDAI, ns); 20 HC        | Insignificantly lower in CD            | none      | [17] |
| F-SH    | BS     | UC      | 30 UC (aa/TW, ns); 30 HC          | ↑ in UC; n/a with activity, CRP or ESR | UC marker | [27] |

|       |        |        |                                                                     |                                                                        |                                       |       |
|-------|--------|--------|---------------------------------------------------------------------|------------------------------------------------------------------------|---------------------------------------|-------|
| F-SH  | BP     | IBD    | 91 IBD (43/CDAI & TW); 45 HC                                        | ↓ in aIBD vs. iIBD and HC                                              | aIBD marker                           | [34]  |
| F-SH  | BS     | UC     | 78 UC (58); 58 HC (TW & RI-EIA)                                     | ↓ in aUC vs. iUC and HC; TW -0.55                                      | UC activity                           | [58]  |
| P-SH  | T-H    | CD, UC | 12 CD (ns/HBI $\geq$ 8); 5 UC (ns/MDAI $\geq$ 6); 12 HC (NM)        | No associations                                                        | none                                  | [44]  |
| aF-SH | BP     | CD     | 51 CD (ai/HBI, ns); 27 HC                                           | ↓ in iCD vs. HC; ↓ in ileocol. vs. col.; CRP -0.45                     | CD marker                             | [54]  |
| alb   | saliva | CD     | 28 CD (ns/CDAI, ns); 20 HC                                          | ↓ in CD                                                                | CD marker                             | [17]  |
| alb   | BP     | IBD    | 167 IBD (132/CDAI $\geq$ 150 or CAI $>$ 5; 100 CD and 67 UC); 45 HC | ↓ in aIBD vs. HC; ↓ in aIBD vs. iIBD                                   | IBD activity                          | [24]  |
| alb   | BS     | CD, UC | 68 UC (33/MDAI, ns); 50 CD (38/CDAI, ns); 45 HC                     | ↓ in aUC and iUC vs. HC; ↓ in aCD and iCD vs. HC; ↓ in aCD vs. iCD     | IBD marker<br>CD activity             | [51]  |
| alb   | BS     | CD     | 14 CD (aa/CDAI, ns); 52 HC; IS                                      | ↓ in aCD vs. HC                                                        | aCD marker                            | [55]  |
| alb   | BS     | IBD    | 19 UC (aa/RI, ns); 16 CD (aa/ CDAI $\geq$ 150); 30 HC               | ↓ in IBD; for stratified IBD severity: 0.41                            | aIBD marker                           | [25]  |
| alb   | BS     | CD, UC | 35 UC (ns/RI $\geq$ 5); 33 CD (ns/CDAI $\geq$ 150); 65 HC           | ↓ in IBD, CD and UC vs. HC                                             | IBD marker                            | [52]  |
| alb   | BS     | CD     | 30 CD (ns/CDAI $\geq$ 150); 66 HC                                   | ↑ in aCD                                                               | aCD marker                            | [50]  |
| alb   | BS     | CD, UC | 40 CD (ns/CDAI, ns); 40 UC (ns/RI-EAI, ns); 80 HC                   | ↓ in CD vs. UC and HC                                                  | CD marker;<br>Diff <sub>CD/UC</sub>   | [20]  |
| alb   | BP     | CD     | 55 CD (35/ CDAI $\geq$ 150); 25 GIS                                 | ↓ in aCD vs. GIS; ↓ in aCD vs. iCD; CDAI -0.76; CRP -0.41              | Diff <sub>CD/GIS</sub><br>CD activity | [111] |
| alb   | BS     | CD     | 71 CD (53/ CDAI, ns); 125 HC                                        | ↓ in CD; gradually ↓ through: iCD/miCD/moCD/sCD; CDAI -0.41; CRP -0.34 | CD marker<br>CD activity              | [53]  |

|      |        |        |                                                                        |                                                                               |                       |       |
|------|--------|--------|------------------------------------------------------------------------|-------------------------------------------------------------------------------|-----------------------|-------|
| alb  | BS     | UC     | 66 UC (MDAI; mild≤5>advanced); 24 HC                                   | n/a; ↓ in females                                                             | none                  | [46]  |
| alb  | BP     | CD     | 51 CD (ai/HBI, ns); 27 HC                                              | ↓ in iCD vs. HC                                                               | CD marker             | [54]  |
| MT   | BS     | UC     | 15 UC; 15 UC+D; 15 HC                                                  | ↑ in UC and UC+D vs. HC<br>tended to be ↑ in UC+D vs. UC                      | UC marker             | [69]  |
| Phb2 | T-I    | UC     | 96 UC (ns/MDAI, ns); 38 HC (NM)                                        | ↓ in UC vs. HC; MDAI 0.36; HA 0.22; EA 0.28; CRP 0.28; ESR 0.22 <sup>3</sup>  | UC marker             | [104] |
| Hpx  | T-M    | CD, UC | 25 pediatric CD (aa/PCDAI, ns); 22 pediatric UC (aa/PUCAI, ns); 24 GIS | ↑ in CD in DeC (2.1x) and in TI (4.1x) and ↑ in UC in AsC (2.2x) <sup>4</sup> | Diff <sub>CD/UC</sub> | [106] |
| Trf  | saliva | CD     | 28 CD (ns/ CDAI, ns); 20 HC                                            | Insignificantly lower in CD                                                   | none                  | [17]  |

<sup>1</sup>, number of patients (number of patients with active disease/scoring system ≥ cut-off for active disease); <sup>2</sup>, data presented as ↑ increased or ↓ decreased levels between indicated groups and as correlation coefficients preceded by the variable; <sup>3</sup>, scatterplots do not show the correlations; <sup>4</sup>, data showing fold change in expression and analyzed separately for three bowel fragments: AsC=ascending colon, DeS=descending colon, TI=terminal ileum; ns, not specified; aa, all active; ai, all inactive; n/a, no association; ileocol., ileocolonic; col., colonic; F-SH, free thiol groups; P-SH, protein thiols; aF-SH, free thiols adjusted to albumin; MT, metallothionein; Phb2, proihin 2; Hpx, hemopexin; Trf, transferrin; HS, healthy controls; CD, Crohn's disease; UC, ulcerative colitis; IBD, inflammatory bowel diseases; aCD, active CD; iCD, inactive CD; miCD, mild CD; moCD, moderate CD; sCD, severe CD; aUC, active UC; iUC, inactive UC; aIBD, active IBD; iIBD, inactive IBD; D, dysplasia; NM, normal mucosa; GIS, non-IBD patients with gastrointestinal symptoms; Diff<sub>CD/UC</sub>; differential marker for CD and UC; Diff<sub>CD/GIS</sub>; differential marker for CD and GIS; CDAI, Crohn's disease activity index, MDAI, Mayo disease activity index; PCDAI, pediatric Crohn's disease activity index; PUCAI, pediatric ulcerative colitis index; RI, Rachmilewitz index; RI-EAI, Rachmilewitz endoscopic activity index; EA, endoscopic activity; HA, histopathological activity; HBI, Harvey-Bradshaw index; CAI, colitis activity index; TW, Truelove-Witt index; CRP, C-reactive protein; ESR, erythrocyte sedimentation rate; IS, interventional study; T-I, tissue-based marker determined with immunohistochemistry (IHC); T-M, tissue metaproteomics – aspirates collected from mucosal-luminal interface for the analysis of microbial and human proteins; BS, blood-based marker determined in serum; BP, blood-based marker determined in plasma; T-H, tissue-based marker determined in homogenates

**Table S4.** Low molecular weight antioxidants as potential biomarkers in inflammatory bowel diseases

| Analyte | Type | Disease | Evaluated population <sup>1</sup>                         | Findings <sup>2</sup>                                                                                      | Potential                                          | Ref. |
|---------|------|---------|-----------------------------------------------------------|------------------------------------------------------------------------------------------------------------|----------------------------------------------------|------|
| Se      | BP   | CD      | 37 CD (26/ CDAI≥150); 37 HC                               | No association                                                                                             | none                                               | [43] |
| Se      | BP   | IBD     | 167 IBD (132; CDAI≥150 or CAI>5; 100 CD and 67 UC); 45 HC | Tended to be lower in aIBD vs. HC (p=0.082)                                                                | none                                               | [24] |
| Se      | BW   | CD      | 20 CD (ns/ CDAI, ns); 16 HC                               | No association                                                                                             | none                                               | [83] |
| Se      | BS   | CD, UC  | 53 UC (aa/ns); 53 CD (36/ns); 30 HC                       | ↓ in IBD vs. HC; ↓ in CD vs. UC; ↓ with UC severity (stratified); ↓ in left-sided UC vs. proctosigmoiditis | IBD marker<br>Diff <sub>CD/UC</sub><br>UC severity | [82] |
| Zn      | BW   | IBD     | 167 IBD (132; CDAI≥150 or CAI>5; 100 CD and 67 UC); 45 HC | No association                                                                                             | none                                               | [24] |

|               |        |        |                                                                                |                                                                                                                     |                                       |       |
|---------------|--------|--------|--------------------------------------------------------------------------------|---------------------------------------------------------------------------------------------------------------------|---------------------------------------|-------|
| Zn            | BS     | IBD    | 16 CD (aa/CDAI $\geq$ 150); 19 UC (aa/RI, ns); 30 HC                           | ↓ in IBD                                                                                                            | aIBD marker                           | [25]  |
| Zn            | BP     | CD, UC | 20 CD (ns); 20 UC (ns); 50 HC                                                  | No association                                                                                                      | none                                  | [26]  |
| TAS           | BP     | CD     | 20 CD (aa/CDAI $>$ 150); 134 HC                                                | ↓ in CD; ↑ normalize post-surgery; CRP -0.65; ESR -0.56                                                             | CD marker                             | [72]  |
| TAS (crocin)  | BS     | CD, UC | 97 CD (35/CDAI, ns); 94 UC (43/SCCAI, ns); 72 HC                               | ↓ in UC and CD vs. HC; ↓ in aCD vs. iCD; ↓ in left-sided and pancolitis vs. proctitis n/a with activity, CRP or ESR | IBD marker<br>CD activity             | [70]  |
| cTAS (crocin) | BS     | CD, UC | 97 CD (35/CDAI, ns); 94 UC (43/SCCAI, ns); 72 HC                               | ↓ in UC and CD vs. HC; ↓ in left-sided and pancolitis vs. proctitis; n/a with activity, CRP or ESR                  | IBD marker                            | [70]  |
| TAS (FRAP)    | saliva | CD, UC | 16 CD (ns); 16 UC (ns); 16 HC                                                  | ↓ in CD vs. HC                                                                                                      | CD marker                             | [16]  |
| TAS (FRAP)    | saliva | CD     | 28 CD (ns/CDAI, ns); 20 HC                                                     | ↓ in CD                                                                                                             | CD marker                             | [17]  |
| TAS (DD)      | BP     | UC     | 20 UC (11/RI, ns); 20 HC                                                       | ↓ in UC; n/a with activity; CRP -0.72; ESR -0.69                                                                    | UC marker                             | [23]  |
| TAS (ABTS)    | BS     | CD     | 15 pediatric CD (ai/PCDAI, $\geq$ 10); 15 pediatric HC; IS                     | n/a; PCDAI: -0.83; CRP -0.49; CAL -0.58                                                                             | CD activity                           | [33]  |
| TAS (ns)      | BS     | CD, UC | 40 CD (ns/CDAI, ns); 40 UC (ns/RI-EAI, ns); 80 HC                              | ↓ in CD and UC vs. HC                                                                                               | IBD marker                            | [20]  |
| TAS (FRAP)    | BP     | CD     | 55 CD (35/CDAI $\geq$ 150); 25 GIS                                             | ↓ in aCD vs. GIS; ↓ in aCD vs. iCD; CDAI -0.57; CRP -0.46                                                           | Diff <sub>CD/GIS</sub><br>CD activity | [111] |
| TAS (FRAP)    | saliva | CD     | 58 CD (36/CDAI $\geq$ 150); 26 HC                                              | n/a; CDAI -0.4; CRP -0.4                                                                                            | none                                  | [37]  |
| TAS (SIND2)   | T-H    | CD     | 45 CD (aa/ns); 30 IBS; IS                                                      | ↑ in CD vs. IBS                                                                                                     | Diff <sub>CD/IBS</sub>                | [110] |
| TAS (FRAP)    | BS     | IBD    | 30 IBD (CDAI for CD & LI for UC); 30 HC                                        | ↓ in IBD; n/a with activity, ESR, CRP, or CAL                                                                       | IBD marker                            | [40]  |
| TAS (ns)      | BP     | IBD    | 71 pediatric IBD (47/PCDAI for CD and PUCAI for UC; 35 CD and 36 UC); 29 GIS   | No association                                                                                                      | none                                  | [22]  |
| TAS (ns)      | BP     | CD     | 25 adult CD (ns/CDAI $\geq$ 150); 88 HC; 21 pediatric CD (ns/PCDAI, ns); 11 HC | n/a; PCDAI -0.53                                                                                                    | CD activity                           | [35]  |

|               |     |        |                                                                                   |                                                                                                                                                                               |                                                |       |
|---------------|-----|--------|-----------------------------------------------------------------------------------|-------------------------------------------------------------------------------------------------------------------------------------------------------------------------------|------------------------------------------------|-------|
| TAS<br>(ABTS) | BP  | CD, UC | 221 CD (ns); 123 UC (ns); 294 HC                                                  | ↑ in CD and UC vs. HC;<br>↑B3 vs. B1 CD behavior <sup>5</sup>                                                                                                                 | IBD marker<br>penetrating<br>CD                | [71]  |
| t-bil         | BS  | CD     | 30 CD (ns/CDAI $\geq$ 150); 66 HC                                                 | ↑ in CD vs. HC;<br>↑ in aCD but ↓ in iCD                                                                                                                                      | CD marker<br>CD activity                       | [50]  |
| t-bil         | BP  | CD     | 55 CD (35/ CDAI $\geq$ 150); 25 GIS                                               | ↓ in aCD vs. GIS; ↓ in aCD vs. iCD;<br>CDAI -0.52; CRP -0.48                                                                                                                  | Diff <sub>CD/GIS</sub><br>CD activity          | [111] |
| t-bil         | BS  | IBD    | 242 CD (ns/CDAI, ns); 211 UC<br>(ns/MDAI, ns); 255 HC                             | ↓ in IBD; ↓ in UC-E3 (extension); ↓<br>in colonic CD (L2); ↓ in<br>penetrating CD(B3) <sup>5</sup>                                                                            | IBD marker<br>UC severity<br>penetrating<br>CD | [75]  |
|               |     |        |                                                                                   | CDAI -0.68; CRP <sup>3</sup> -0.45; ESR <sup>3</sup> -0.45;<br>CAL <sup>3</sup> -0.39; MDAI -0.43; CRP <sup>4</sup> -<br>0.47; ESR <sup>4</sup> -0.46; CAL <sup>4</sup> -0.46 | IBD activity                                   |       |
| t-bil         | BS  | CD     | 71 CD (53/CDAI, ns); 125 HC                                                       | ↓ in CD; gradually ↓ through:<br>iCD/miCD/moCD/sCD;<br>CDAI -0.62; CRP -0.36                                                                                                  | CD marker<br>CD activity                       | [53]  |
| i-bil         | BS  | CD     | 71 CD (53/CDAI, ns); 125 HC                                                       | ↓ in CD; gradually ↓ through:<br>iCD/miCD/moCD/sCD;<br>CDAI -0.62; CRP -0.37                                                                                                  | CD marker<br>CD activity                       | [53]  |
| d-bil         | BS  | CD     | 71 CD (53/CDAI, ns); 125 HC                                                       | ↓ in CD; gradually ↓ through:<br>iCD/miCD/moCD/sCD;<br>CDAI -0.30; CRP -0.37                                                                                                  | CD marker<br>CD activity                       | [53]  |
| GSH+G<br>SSG  | BP  | CD, UC | 20 CD (ns); 20 UC (ns); 50 HC                                                     | No association                                                                                                                                                                | none                                           | [26]  |
| GSH           | BP  | CD     | 22 CD pediatric (13/CDAI $\geq$ 150); 10 HC                                       | ↑ in CD;<br>insignificantly ↑ in aCD vs. iCD                                                                                                                                  | CD marker                                      | [86]  |
| GSH           | BP  | CD     | 10 CD (8/CDAI, >150); 10 HC; IS                                                   | No association                                                                                                                                                                | none                                           | [88]  |
| GSH           | BE  | CD     | 25 adult CD (ns/CDAI $\geq$ 150); 88 HC; 21<br>pediatric CD (ns/PCDAI, ns); 11 HC | ↓ in complications (abscess, fistula<br>or stenosis)                                                                                                                          | Compl.                                         | [35]  |
| GSH           | BS  | UC     | 15 UC; 25 UC+D; 15 HC                                                             | ↓ in UC UC+D vs. HC<br>↓ in UC+D vs. UC                                                                                                                                       | progression<br>UC marker                       | [69]  |
| GSH           | BP  | CD     | 55 CD (35/ CDAI $\geq$ 150); 25 GIS                                               | ↓ in aCD vs. GIS; ↓ in aCD vs. iCD;<br>CDAI -0.76; CRP -0.41                                                                                                                  | Diff <sub>CD/GIS</sub><br>CD activity          | [111] |
| GSH           | T-H | CD     | 20 CD; 18 infl. and 14 non-infl. biopsies;<br>16 HC (NM)                          | ↓ in infl. vs. non-infl. and NM                                                                                                                                               | MI                                             | [83]  |



|       |        |    |                                                                                                                                        |                                                                                                                                                    |                           |      |
|-------|--------|----|----------------------------------------------------------------------------------------------------------------------------------------|----------------------------------------------------------------------------------------------------------------------------------------------------|---------------------------|------|
| GSH   | BE     | UC | 81 UC (ns/AI $\geq$ 150); 85 HC                                                                                                        | ↓ in UC vs. HC; n/a with activity                                                                                                                  | UC marker                 | [32] |
| GSH   | saliva | CD | 58 CD (36/CDAI $\geq$ 150); 26 HC                                                                                                      | ↓ aCD vs. iCD and HC;<br>CDAI -0.5; CRP -0.6                                                                                                       | CD activity               | [37] |
| Cys   | BP     | CD | 10 CD (8/CDAI $>$ 150); 10 HC; IS                                                                                                      | ↓ in CD                                                                                                                                            | CD marker                 | [88] |
| UA    | saliva | CD | 28 CD (ns/CDAI, ns); 20 HC                                                                                                             | ↓ in CD                                                                                                                                            | CD marker                 | [17] |
| UA/Cr |        |    | 334 CD (174/CDAI $>$ 150 or and/or (HBI $\geq$ 5) and/or CRP $\geq$ 5mg/L)<br>101 UC (80/MDAI $\geq$ 6 and/or CRP $\geq$ 5mg/L); 51 HC | ↑aCD vs. iCD and HC;<br>↑aUC and iUC vs. HC;<br>↑ in CD-L2 vs. L1 and L3 <sup>5</sup><br>CDAI 0.18; HBI 0.15; CRP <sup>3</sup> 0.53;<br>n/a for UC | IBD marker<br>CD activity | [78] |
| UA    | BS     | CD | 71 CD (53/CDAI, ns); 125 HC                                                                                                            | ↓ in CD; CDAI -0.30; CRP -0.34                                                                                                                     | CD marker                 | [53] |

<sup>1</sup>, number of patients (number of patients with active disease/scoring system $\geq$ cut-off for active disease); <sup>2</sup>, data presented as ↑ increased or ↓ decreased levels between indicated groups and as correlation coefficients preceded by the variable; <sup>3</sup>, correlation in CD patients; <sup>4</sup>, correlation in UC patients; <sup>5</sup>, Montreal classification; ns, not specified; aa, all active; ai, all inactive; n/a, no association; Compl., complications; inflam., inflamed; Se, selenium; Zn, zinc; TAS, total antioxidant status; cTAS, corrected total antioxidant status (after subtraction of the interactions due to endogenous uric acid, bilirubin and albumin); DD, o-dianizidine method; ABTS, ; S<sub>IND2</sub>, the sum of light energy over 2 min depends on activity of the antioxidant and antiradical defense system; FRAP, assay which measures the reduction of Fe<sup>3+</sup> (ferric ion) to Fe<sup>2+</sup> (ferrous ion) in the presence of antioxidants; t-bil, total bilirubin; i-bil, indirect bilirubin; d-bilirubin; GSH, reduced glutathione; GSSG, oxidized glutathione; Cys, cysteine; UA, uric acid; UA/Cr, uric acid adjusted to creatinine; HS, healthy controls; CD, Crohn's disease; UC, ulcerative colitis; IBD, inflammatory bowel diseases; a IBD, active IBD; iIBD, inactive IBD; miCD, mild CD; moCD, moderate CD; sCD, severe CD; aCD, active CD; iCD, inactive CD; aUC, active UC; iUC, inactive UC; IBS, irritable bowel syndrome; D, dysplasia; NM, normal mucosa; GIS, non-IBD patients with gastrointestinal symptoms; MI, mucosal inflammation; Diff<sub>CD/UC</sub>; differential marker for CD and UC; Diff<sub>CD/GIS</sub>; differential marker for CD and GIS; Diff<sub>CD/IBS</sub>; differential marker for CD and IBS; CDAI, Crohn's disease activity index, MDAI, Mayo disease activity index; PCDAI, pediatric Crohn's disease activity index; PUCAI, pediatric ulcerative colitis index; RI, Rachmilewitz index; RI-EAI, Rachmilewitz endoscopic activity index; LI, Lichtiger index; HBI, Harvey-Bradshaw index; AI, activity index defined by authors in their paper; SCCAI, Simple Clinical Colitis Activity Index; CRP, C-reactive protein; ESR, erythrocyte sedimentation rate; CAL, fecal calprotectin; IS, interventional study; BS, blood-based marker determined in serum; BE, blood-based marker determined in erythrocytes; BP, blood-based marker determined in plasma; BW, blood-based marker determined in whole blood; T-H, tissue-based marker determined in homogenates.

**Table S5.** Vitamins and related compounds as potential markers in inflammatory bowel diseases

| Analyte | Type | Disease | Evaluated population <sup>1</sup>                     | Findings <sup>2</sup>                                                                    | Potential                                 | Ref. |
|---------|------|---------|-------------------------------------------------------|------------------------------------------------------------------------------------------|-------------------------------------------|------|
| Vit.A   | BP   | CD      | 22 pediatric CD (13/CDAI $\geq$ 150); 10 HC           | ↓ in CD                                                                                  | CD marker                                 | [86] |
| Vit.A   | BP   | UC, CD  | 46 UC (15/PTI $>$ 2); 37 CD (10/CDAI $>$ 150); 386 HC | ↓ in UC and CD vs. HC;<br>n/a with activity, CRP or ESR;<br>↓ if BMI $<$ 20              | IBD marker<br>Malnutrition                | [87] |
| Vit.A   | BP   | CD      | 20 CD (aa/CDAI $>$ 150); 134 HC                       | ↓ in CD; ↑ post-surgery but still ↑ than in HC                                           | CD marker                                 | [72] |
| Vit.A   | BP   | CD      | 37 CD (26/CDAI $\geq$ 150); 37 HC                     | No associations                                                                          | none                                      | [43] |
| Vit.A   | BP   | IBD     | 51 IBD (ns); 67 AD (90% tubulare); 136 CRC; 79 HC     | ↑ in IBD vs. CRC                                                                         | Diff <sub>IBD/CRC</sub>                   | [89] |
| Vit.E   | BP   | CD      | 22 pediatric CD (13/CDAI, $\geq$ 150); 10 HC          | No association                                                                           | none                                      | [86] |
| Vit.E   | BP   | UC, CD  | 46 UC (15/PTI $>$ 2); 37 CD (10/CDAI $>$ 150); 386 HC | ↓ in UC and CD vs. HC;<br>↓ in aUC vs. iUC; n/a with activity, CRP, ESR; ↓ if BMI $<$ 20 | IBD marker<br>UC activity<br>Malnutrition | [87] |
| Vit.E   | BP   | CD      | 20 CD (aa/CDAI $>$ 150); 134 HC                       | ↓ in CD; insign. ↑ post-surgery                                                          | CD marker                                 | [72] |
| Vit.E   | BP   | CD      | 37 CD (26/CDAI $\geq$ 150); 37 HC                     | No associations                                                                          | none                                      | [43] |
| Vit.E   | BP   | CD      | 10 CD (8/CDAI $>$ 150); 10 HC                         | Tended to be ↓ in CD                                                                     | none                                      | [88] |
| Vit.E   | BP   | IBD     | 51 IBD (ns); 67 AD (90% tubulare); 136 CRC; 79 HC     | No association                                                                           | none                                      | [89] |

|              |                 |        |                                                                     |                                                                                                                    |                                                          |      |
|--------------|-----------------|--------|---------------------------------------------------------------------|--------------------------------------------------------------------------------------------------------------------|----------------------------------------------------------|------|
| Vit.E        | BP              | IBD    | 167 IBD (132/CDAI $\geq$ 150 or CAI $>$ 5; 100 CD and 67 UC); 45 HC | No associations                                                                                                    | none                                                     | [24] |
| Vit.C        | BP              | CD     | 37 CD (26/ CDAI $\geq$ 150); 37 HC                                  | ↓ in CD; n/a with activity                                                                                         | CD marker                                                | [43] |
| Vit.C        | BP              | CD     | 10 CD (8/CDAI $>$ 150); 10 HC; IS                                   | Tended to be ↓ in CD                                                                                               | none                                                     | [88] |
| Vit.C        | BP              | IBD    | 167 IBD (132/CDAI $\geq$ 150 or CAI $>$ 5; 100 CD and 67 UC); 45 HC | ↓ in IBD, both iIBD and aIBD                                                                                       | IBD marker                                               | [24] |
| Vit.C        | BP              | IBD    | 51 IBD (ns); 67 AD (90% tubulare); 136 CRC; 79 HC                   | ↑ in IBD vs. CRC                                                                                                   | Diff <sub>IBD/CRC</sub>                                  | [89] |
| $\alpha$ -CA | BP              | UC, CD | 46 UC (15/PTI $>$ 2); 37 CD (10/CDAI $>$ 150); 386 HC               | No associations                                                                                                    | None                                                     | [87] |
| $\alpha$ -CA | BP              | CD     | 37 CD (26/ CDAI $\geq$ 150); 37 HC                                  | ↓ in CD; n/a with activity                                                                                         | CD marker                                                | [43] |
| $\alpha$ -CA | BP              | IBD    | 167 IBD (132/CDAI $\geq$ 150 or CAI $>$ 5; 100 CD and 67 UC); 45 HC | ↓ in IBD, both iIBD and aIBD                                                                                       | IBD marker                                               | [24] |
| $\beta$ -CA  | BP              | CD     | 22 pediatric CD (13/CDAI $\geq$ 150); 10 HC                         | No association                                                                                                     | none                                                     | [86] |
| $\beta$ -CA  | BP              | UC, CD | 46 UC (15/PTI $>$ 2); 37 CD (10/CDAI $>$ 150); 386 HC               | ↓ in UC and CD vs. HC; ↓ in aCD vs. iCD; n/a with activity, CRP, ESR                                               | IBD marker<br>CD activity                                | [87] |
| $\beta$ -CA  | BP              | CD     | 37 CD (26/ CDAI $\geq$ 150); 37 HC                                  | ↓ in CD; n/a with activity                                                                                         | CD marker                                                | [43] |
| $\beta$ -CA  | BP              | CD     | 10 CD (8/CDAI $>$ 150); 10 HC; IS                                   | ↓ in CD                                                                                                            | CD marker                                                | [88] |
| $\beta$ -CA  | BP              | IBD    | 167 IBD (132/CDAI $\geq$ 150 or CAI $>$ 5; 100 CD and 67 UC); 45 HC | ↓ in IBD, both iIBD and aIBD                                                                                       | IBD marker                                               | [24] |
| $\beta$ -CA  | BS <sub>L</sub> | CD     | 43 CD (16/CDAI $>$ 150); 15 HC                                      | ↓ CD vs. HC; ↓ aCD vs. iCD                                                                                         | CD marker<br>CD activity                                 | [41] |
| $\Sigma$ CA  | BP              | UC, CD | 46 UC (15/PTI $>$ 2); 37 CD (10/CDAI $>$ 150); 386 HC               | ↓ in UC and CD vs. HC; ↓ in aUC vs. iUC; ↓ in aCD vs. iCD; CDAI -0.36; PTI -0.33; n/a with CRP, ESR; if BMI $<$ 20 | IBD marker<br>UC activity<br>CD activity<br>Malnutrition | [87] |
| $\Sigma$ CA  | BP              | IBD    | 167 IBD (132/CDAI $\geq$ 150 or CAI $>$ 5; 100 CD and 67 UC); 45 HC | ↓ in IBD, both iIBD and aIBD                                                                                       | IBD marker                                               | [24] |
| Lut          | BP              | UC, CD | 46 UC (15/PTI $>$ 2); 37 CD (10/CDAI $>$ 150); 386 HC               | ↓ in aCD vs. iCD; n/a with activity, CRP or ESR                                                                    | CD activity                                              | [87] |
| Lut          | BP              | CD     | 37 CD (26/ CDAI $\geq$ 150); 37 HC                                  | No associations                                                                                                    | none                                                     | [43] |
| Zea          | BP              | UC, CD | 46 UC (15/PTI $>$ 2); 37 CD (10/CDAI $>$ 150); 386 HC               | ↓ in aUC vs. iUC; ↓ in aCD vs. iCD; n/a with activity, CRP, ESR                                                    | UC activity<br>CD activity                               | [87] |
| Zea          | BP              | CD     | 37 CD (26/ CDAI $\geq$ 150); 37 HC                                  | No associations                                                                                                    | none                                                     | [43] |
| Lyc/Zea      | BP              | IBD    | 167 IBD (132/CDAI $\geq$ 150 or CAI $>$ 5; 100 CD and 67 UC); 45 HC | ↓ in IBD, both iIBD and aIBD; ↓ in aIBD vs. iIBD (p=0.052)                                                         | IBD marker                                               | [24] |
| Lyc          | BP              | UC, CD | 46 UC (15/PTI $>$ 2); 37 CD (10/CDAI $>$ 150); 386 HC               | ↓ in UC and CD vs. HC; ↓ in aUC vs. iUC; ↓ in aCD vs. iCD; n/a with activity, CRP, ESR                             | IBD marker<br>UC activity<br>CD activity                 | [87] |
| Lyc          | BP              | CD     | 37 CD (26/ CDAI $\geq$ 150); 37 HC                                  | ↓ in CD; n/a with activity                                                                                         | CD marker                                                | [43] |
| Lyc          | BP              | IBD    | 167 IBD (132/CDAI $\geq$ 150 or CAI $>$ 5; 100 CD and 67 UC); 45 HC | ↓ in IBD, both iIBD and aIBD; ↓ in aIBD vs. iIBD                                                                   | IBD marker<br>IBD activity                               | [24] |
| $\beta$ -CX  | BP              | UC, CD | 46 UC (15/PTI $>$ 2); 37 CD (10/CDAI $>$ 150); 386 HC               | ↓ in UC and CD vs. HC; ↓ in aUC vs. iUC; n/a with activity, CRP or ESR                                             | IBD marker<br>UC activity                                | [87] |
| $\beta$ -CX  | BP              | CD     | 37 CD (26/ CDAI $\geq$ 150); 37 HC                                  | ↓ in CD; n/a with activity                                                                                         | CD marker                                                | [43] |
| $\beta$ -CX  | BP              | IBD    | 167 IBD (132/CDAI $\geq$ 150 or CAI $>$ 5; 100 CD and 67 UC); 45 HC | ↓ in IBD, both iIBD and aIBD                                                                                       | IBD marker                                               | [24] |

<sup>1</sup>, number of patients (number of patients with active disease/scoring system $\geq$ cut-off for active disease); <sup>2</sup>, data presented as ↑ increased or ↓ decreased levels between indicated groups and as correlation coefficients preceded by the variable; ns, not specified; aa, all active; n/a, no association; insign., non-significant; Vit, vitamin;  $\beta$ -CA,  $\beta$ -carotene;  $\alpha$ -CA,  $\alpha$ -carotene;  $\Sigma$ -CA, total carotenoids; Lut, lutein; Lyc, lycopene; Zea, zeaxanthin;  $\beta$ -CX,  $\beta$ -cryptoxanthin; HS, healthy controls; CD, Crohn's disease; UC, ulcerative colitis; IBD, inflammatory bowel disease; aIBD, active IBD; iIBD, inactive IBD; aCD, active CD; iCD, inactive CD; aUC, active UC; iUC, inactive UC; CRC, colorectal cancer; AD, adenoma; BMI, body mass index; Diff<sub>IBD/CRC</sub>, differential marker for IBD and CRC; CDAI, Crohn's disease activity index; PTI, Powell-Tuck index; CAI, colitis activity index; PCDAI, pediatric Crohn's disease activity index; PUCAI, pediatric ulcerative colitis index; CRP, C-reactive protein; ESR, erythrocyte sedimentation rate; IS, interventional study; BS, blood-based marker determined in serum; BP, blood-based marker determined in plasma; BL, blood-based marker determined in leukocytes; BS<sub>L</sub>, blood-based marker determined in lipid fraction of serum

**Table S6.** Lipid peroxidation markers as potential biomarkers in inflammatory bowel disease

| Analyte                     | Type   | Disease | Evaluated population <sup>1</sup>                                              | Findings <sup>2</sup>                                   | Potential                 | Ref. |
|-----------------------------|--------|---------|--------------------------------------------------------------------------------|---------------------------------------------------------|---------------------------|------|
| MDA<br>(TBARS)              | BP     | CD      | 22 pediatric CD (13/CDAI $\geq$ 150); 10 HC                                    | ↑ in CD; insign. ↑ in aCD vs. iCD                       | CD marker                 | [86] |
| MDA<br>(TBARS)              | BP     | CD      | 20 CD (aa/CDAI $>$ 150); 134 HC                                                | ↑ in CD; ↓ post-surgery but ↑ vs. HC; CRP 0.6; ESR 0.51 | CD marker                 | [72] |
| MDA<br>(TBARS)              | BS     | CD, UC  | 5 CD (1/HBI, ns); 7 UC (low activity/SCCAI, ns); 12 HC                         | ↑ in IBD vs HC; ↑ in CD and UC vs. HC                   | IBD marker                | [93] |
| MDA<br>(TBARS)              | BS     | UC      | 30 UC (aa/TW, ns); 30 HC                                                       | ↑ in UC; n/a with severity, CRP, ESR                    | UC marker                 | [17] |
| MDA<br>(TBARS)              | BP     | CD      | 25 adult CD (ns/CDAI $\geq$ 150); 88 HC; 21 pediatric CD (ns/PCDAI, ns); 11 HC | ↑ in complications (abscess, fistula or stenosis)       | Compl. CD marker          | [35] |
| MDA<br>(TBARS)              | saliva | CD, UC  | 16 CD (ns); 16 UC (ns); 16 HC                                                  | ↑ in CD vs. HC                                          | CD marker                 | [16] |
| MDA<br>(TBARS)              | saliva | CD      | 28 CD (ns/CDAI, ns); 20 HC                                                     | ↑ in CD                                                 | CD marker                 | [17] |
| MDA<br>(TBARS)              | saliva | CD      | 58 CD (36/CDAI $\geq$ 150); 26 HC                                              | ↑ aCD vs. iCD and HC; CDAI 0.8; CRP 0.7                 | aCD marker<br>CD activity | [37] |
| MDA <sup>3</sup><br>(TBARS) | BE     | IBD     | 91 IBD (43/CDAI & TW); 45 HC                                                   | ↑ in aIBD and iIBD vs. HC; n/a with activity            | IBD marker                | [34] |
| MDA<br>(TBARS)              | BP     | UC      | 59 UC (33/RI $\geq$ 4); 51 HC                                                  | No associations                                         | none                      | [92] |
| MDA<br>(TBARS)              | BS     | IBD     | 14 CD (8/CDAI $\geq$ 150); 27 UC (13/MTS $\geq$ 4); 18 HC                      | ↑ in aIBD vs. HC                                        | IBD activity              | [38] |
| MDA<br>(TBARS)              | T-H    | CD, UC  | 12 CD (ns/HBI $\geq$ 8); 5 UC (ns/MDAI $\geq$ 6); 12 HC (NM)                   | ↑ in CD and UC vs. HC                                   | IBD marker                | [44] |
| MDA<br>(TBARS)              | BS     | CD      | 27 CD (8/HBI $\geq$ 5); 22 HC                                                  | ↑ in CD                                                 | CD marker                 | [94] |
| MDA<br>(TBARS)              | BP     | CD, UC  | 221 CD (ns); 123 UC (ns); 294 HC                                               | No associations                                         | none                      | [71] |
| MDA<br>(TBARS)              | BS     | IBD     | 30 IBD (CDAI for CD & LI for UC); 30 HC                                        | ↑ in IBD; n/a with activity, CRP, ESR or CAL            | IBD marker                | [40] |
| MDA<br>(TBARS)              | BP     | CD, UC  | 20 CD (ns); 20 UC (ns); 50 HC                                                  | n/a; CRP <sup>5</sup> -0.63                             | none                      | [26] |

|             |       |        |                                                        |                                                                                                     |                                                    |       |
|-------------|-------|--------|--------------------------------------------------------|-----------------------------------------------------------------------------------------------------|----------------------------------------------------|-------|
| MDA (TBARS) | BP    | CD, UC | 35 UC (13/RI, ns); 12 CD (6/HBI, ns); 30 HC            | No association                                                                                      | none                                               | [39]  |
| MDA (TBARS) | BP    | CD     | 43 CD (16/CDAI>150); 15 HC                             | ↑ CD vs. HC; ↑ in aCD vs. iCD and HC                                                                | CD marker<br>CD activity                           | [41]  |
| MDA (TBARS) | BP    | CD     | 25 aCD (HBI≥5)→19 rCD <sup>4</sup> ; 20 iCD; HC        | ↑ in aCD, iCD, and rCD, vs. HC; ↑ in aCD vs. iCD                                                    | CD marker;<br>CD activity                          | [36]  |
| HNE         | BS    | CD, UC | 5 CD (1/HBI, ns); 7 UC (low activity/SCCAI, ns); 12 HC | ↑ in IBD vs. HC; ↑ in CD and UC vs. HC                                                              | IBD marker                                         | [93]  |
| DIEN        | BS    | CD     | 14 CD (aa/ CDAI, ns); 52 HC                            | Not associations                                                                                    | none                                               | [55]  |
| DIEN        | T-H   | CD, UC | 12 CD (ns/HBI≥8); 5 UC (ns/MDAI≥6); 12 HC (NM)         | ↑ in CD and UC vs. HC                                                                               | IBD marker                                         | [44]  |
| maxPR       | BP    | CD     | 20 CD (aa/CDAI>150); 134 HC                            | No associations                                                                                     | none                                               | [72]  |
| LPO         | BS    | CD     | 15 pediatric CD (aa/PCDAI≥10); 15 HC; IS               | No associations                                                                                     | none                                               | [33]  |
| LPO         | BE    | UC     | 81 UC (ns/AI≥150); 85 HC                               | ↑ in UC vs. HC; n/a activity                                                                        | UC marker                                          | [32]  |
| LPO         | BS    | CD     | 43 CD (16/CDAI>150); 15 HC                             | ↑ CD vs. HC; ↑ in aCD vs. iCD and HC                                                                | CD marker<br>CD activity                           | [41]  |
| LOOH        | T-H   | CD     | 45 CD (aa/ns); 30 IBS; IS                              | ↑ in CD vs. IBS                                                                                     | Diff <sub>CD/IBS</sub>                             | [110] |
| LOOH        | BP    | CD, UC | 20 CD (ns); 20 UC (ns); 50 HC                          | ↓ in CD and UC vs. HC                                                                               | none                                               | [26]  |
| LOOH        | BP    | CD     | 52 CD (37/CDAI≥150); 99 HC                             | No associations                                                                                     | none                                               | [21]  |
| pentane     | EA    | CD     | 37 CD (26/CDAI≥150); 37 HS                             | ↑ in CD; n/a with activity                                                                          | CD marker                                          | [43]  |
| ethane      | EA    | CD     | 37 CD (26/CDAI≥150); 37 HC                             | ↑ in CD; n/a with activity                                                                          | CD marker                                          | [43]  |
| 8-iso-PGF2a | urine | CD     | 23 CD (12/CDAI≥150); 23 HC                             | ↑ in CD; tended to be ↑ in aCD vs. iCD (p=0.09); CRP 0.45                                           | CD marker                                          | [95]  |
| 8-iso-PGF2a | BP    | CD     | 37 CD (26/CDAI≥150); 37 HC                             | ↑ in CD; n/a with activity                                                                          | CD marker                                          | [43]  |
| 8-iso-PGF2a | urine | CD     | 15 pediatric CD (aa/PCDAI≥10); 15 HC; IS               | No associations                                                                                     | none                                               | [33]  |
| 8-iso-PGF2a | BS    | CD, UC | 31 CD (ns/CDAI≥150)<br>32 UC (ns/DAI≥6); 64 HC         | ↑ in aUC and iUC vs. HC<br>↑ in aUC vs. iUC<br>↑ in aCD and iCD vs. HC<br>↑ in CD than UC; DAI 0.40 | IBD marker<br>UC activity<br>Diff <sub>CD/UC</sub> | [96]  |
| 8-iso-PGF2a | urine | CD, UC | 57 CD (28/CDAI≥150); 67 UC (19/RI≥4); 37 HC; IS        | ↑ in UC and CD vs. HC; ↑ in aIBD vs. iIBD                                                           | IBD marker<br>IBD activity                         | [97]  |
| oxLDL       | BP    | CD     | 52 CD (37/CDAI≥150); 99 HC                             | ↓ in aCD vs. HC                                                                                     | aCD marker                                         | [21]  |

|       |    |     |                                                                              |                                                     |              |      |
|-------|----|-----|------------------------------------------------------------------------------|-----------------------------------------------------|--------------|------|
| oxLDL | BP | IBD | 71 pediatric IBD (47/PCDAI for CD and PUCAI for UC; 35 CD and 36 UC); 29 GIS | ↑ in iIBD vs. aIBD; ↑ with duration and cholesterol | IBD activity | [22] |
| OLAB  | BP | CD  | 52 CD (37/CDAI≥150); 99 HC                                                   | n/a; CDAI 0.31                                      | none         | [21] |
| OLAB  | BP | IBD | 71 pediatric IBD (47/PCDAI for CD and PUCAI for UC; 35 CD and 36 UC); 29 GIS | No association                                      | none         | [22] |

<sup>1</sup>, number of patients (number of patients with active disease/scoring system ≥ cut-off for active disease); <sup>2</sup>, data presented as ↑ increased or ↓ decreased levels between indicated groups and as correlation coefficients preceded by the variable; <sup>3</sup>, determined following HPLC separation; <sup>4</sup>, patients with active disease were followed until they have achieved remission; <sup>5</sup> correlation in CD patients; ns, not specified; aa, all active; n/a, no association; insign., non-significantly; MDA (TBARS), malondialdehyde determined as thiobarbituric acid-reactive substances (TBARS); HNE, 4-hydroxy-2-nonenal; DIEN, conjugated diens; maxPR, the maximal rate of oxidation (depends on compounds available for peroxidation); LPO, lipid peroxides; LOOH, lipid hydroperoxides; 8-iso-PGF2a, 8-iso-prostaglandin F2 alpha; oxLDL, oxidized light-density lipoprotein; OLAB, antibodies directed against oxLDL; HS, healthy controls; CD, Crohn's disease; UC, ulcerative colitis; IBD, inflammatory bowel diseases; iIBD, inactive IBD; aIBD, active IBD; aCD, active CD; iCD, inactive CD; rCD, remission CD; aUC, active UC; iUC, inactive UC; NM, normal mucosa; GIS, non-IBD patients with gastrointestinal symptoms; Diff<sub>CD/UC</sub>; differential marker for CD and UC; Diff<sub>CD/IBS</sub>; differential marker for CD and IBS; CDAI, Crohn's disease activity index, MDAI, Mayo disease activity index; PCDAI, pediatric Crohn's disease activity index; PUCAI, pediatric ulcerative colitis index; RI, Rachmilewitz index; LI, Lichtiger index; HBI, Harvey-Bradshaw index; AI, activity index defined by authors in their paper; TW, Truelove-Witt index; MTS, Mayo total score; SCCAI, Simple Clinical Colitis Activity Index; CRP, C-reactive protein; ESR, erythrocyte sedimentation rate; CAL, fecal calprotectin; IS, interventional study; BS, blood-based marker determined in serum; BE, blood-based marker determined in erythrocytes; BP, blood-based marker determined in plasma; T-H, tissue-based marker determined in homogenates; EA, exhaled air.

**Table S7.** Markers of oxidative damage to proteins as potential biomarkers in inflammatory bowel diseases

| Analyte | Type | Disease | Evaluated population <sup>1</sup>                                                                                   | Findings <sup>2</sup>                                                                                                                                                                                                                                                     | Potential                                                         | Ref.  |
|---------|------|---------|---------------------------------------------------------------------------------------------------------------------|---------------------------------------------------------------------------------------------------------------------------------------------------------------------------------------------------------------------------------------------------------------------------|-------------------------------------------------------------------|-------|
| PC      | T-H  | CD, UC  | 22 UC (15/ ns), paired biopsies inf. & non-infl. colon (n=6 aUC); 11 CD (6/ns); 14 specific colitis (infl.); 10 GIS | ↑ in aUC and iUC vs. GIS;<br>↑ in aCD and iCD vs. GIS;<br>↑ in spec. colitis vs. GIS;<br>↑ in aUC/aCD vs. iUC/iCD;<br>↑ in infl. and non-infl. aUC vs. iUC and GIS;<br>↑ in infl. aUC vs. non-infl.;<br>If stratified by severity into: CON/iIBD/miIBD/moIBD/sIBD, r=0.81 | IBD marker<br>IBD activity<br>Diff <sub>IBD/GIS</sub><br>MI in UC | [19]  |
| PC      | T-H  | UC      | 12 UC: 6 non-progressors (UC) and 6 progressors (UC+LGD, HGD or UCAC)                                               | ↑ in UC+LGD and UC+HGD vs. UC; tended to be ↑ also in non-dysplastic tissue from progressors (p=0.08)                                                                                                                                                                     | Progression                                                       | [123] |
| PC      | BP   | CD, UC  | 221 CD (ns); 123 UC (ns); 294 HC                                                                                    | No association                                                                                                                                                                                                                                                            | none                                                              | [71]  |
| nTyr    | T-H  | CD, UC  | 22 UC (15/ ns), paired biopsies inf. & non-infl. colon (n=6 aUC); 11 CD (6/ns); 14 specific colitis (infl.); 10 GIS | ↑ in aUC and iUC vs. GIS;<br>↑ in aCD and iCD vs. GIS;<br>↑ in spec. colitis vs. GIS;<br>↑ in aUC/aCD vs. iUC/iCD;<br>↑ in infl. and non-infl. aUC vs. iUC and GIS;<br>↑ in infl. aUC vs. non-infl.;<br>If stratified by severity into: CON/iIBD/miIBD/moIBD/sIBD, r=0.84 | IBD marker<br>IBD activity<br>Diff <sub>IBD/GIS</sub><br>MI in UC | [19]  |
| nTyr    | T-H  | CD, UC  | 18 UC biopsies and 22 CD biopsies                                                                                   | No difference between CD and UC                                                                                                                                                                                                                                           | none                                                              | [100] |
| nTyr    | BS   | CD, UC  | 57 UC (38/ns); 62 CD (42/ns); 20 HC                                                                                 | ↑ in aUC vs. iUC<br>↓ in iUC vs. CON                                                                                                                                                                                                                                      | UC marker<br>UC activity                                          | [100] |
| Cl-Tyr  | T-H  | CD, UC  | 18 UC and 22 CD biopsies                                                                                            | No difference between CD and UC                                                                                                                                                                                                                                           | none                                                              | [100] |

|        |    |        |                                            |                                                              |                                                        |
|--------|----|--------|--------------------------------------------|--------------------------------------------------------------|--------------------------------------------------------|
| Cl-Tyr | BS | CD, UC | 57 UC (38/ns); 62 CD (42/ns); 20 HC        | ↑ in aUC and aCD vs. HC; ↑ in aUC vs. iUC and in aCD vs. iCD | IBD marker [100]<br>IBD activity                       |
| AOPP   | BS | UC     | 30 UC (aa/TW, ns); 30 HC                   | ↑ in UC; n/a with severity, CRP, ESR                         | UC marker [18]                                         |
| AOPP   | BS | UC     | 15 UC; 15 UC+D; 15 HC                      | ↑ in UC+D and UC vs. HC<br>↑ in UC+D vs. UC                  | UC marker [69]<br>Progression                          |
| AOPP   | BP | UC     | 59 UC (33/RI≥4); 51 HC                     | ↑ in aUC vs. iUC and HC; EA 0.61                             | UC activity [92]<br>MI                                 |
| AOPP   | BS | CD     | 15 pediatric CD (ai/PCDAI, ≥10); 15 HC; IS | ↑ in CD                                                      | CD marker [33]                                         |
| IMA    | BS | CD, UC | 39 CD (ns); 41 UC (ns), 33 HC              | ↑ in IBD vs. HC; ↑ in UC vs. CD and HC                       | IBD marker [101] <sup>3</sup><br>Diff <sub>CD/UC</sub> |

<sup>1</sup>, number of patients (number of patients with active disease/scoring system ≥ cut-off for active disease); <sup>2</sup>, data presented as ↑ increased or ↓ decreased levels between indicated groups and as correlation coefficients preceded by the variable; <sup>3</sup>, based on abstract; ns, not specified; aa, all active; ai, all inactive; n/a, no association; inflam., inflamed; spec. specific colitis; PC, protein carbonyls; nTyr, 3-nitrotyrosine; Cl-Tyr, 3-chlorotyrosine; AOPP, advanced oxidation protein products; IMA, ischemia-modified protein; HS, healthy controls; CD, Crohn's disease; UC, ulcerative colitis; IBD, inflammatory bowel disease; iIBD, inactive IBD; miIBD, mild IBD; moIBD, moderate IBD; sIBD, severe IBD; aIBD, active IBD; aCD, active CD; iCD, inactive CD; aUC, active UC; iUC, inactive UC; LGD, low grade dysplasia; HGD, high grade dysplasia; UCAC, UC-associated cancer, GIS, non-IBD patients with gastrointestinal symptoms; MI, mucosal inflammation; Diff<sub>CD/UC</sub>; differential marker for CD and UC; Diff<sub>IBD/GIS</sub>; differential marker for IBD and GIS; CDAI, Crohn's disease activity index, PCDAI, pediatric Crohn's disease activity index; RI, Rachmilewitz index; TW, Truelove-Witt index; CRP, C-reactive protein; ESR, erythrocyte sedimentation rate; IS, interventional study; BS, blood-based marker determined in serum; BP, blood-based marker determined in plasma; T-H, tissue-based marker determined in homogenates.

**Table S8.** Markers of oxidative damage to DNA as potential biomarkers in inflammatory bowel diseases

| Analyte         | Type | Disease | Evaluated population <sup>1</sup>                 | Findings <sup>2</sup>                                                                                | Potential                           | Ref.  |
|-----------------|------|---------|---------------------------------------------------|------------------------------------------------------------------------------------------------------|-------------------------------------|-------|
| 8-OHdG          | BL   | UC, CD  | 46 UC (15/PTI>2); 37 CD (10/CDAI>150); 386 HC     | ↑ in CD and UC vs. HC; n/a with activity, CRP or ESR; ↓ in ST or IS-treated patients vs. 5-ASA alone | IBD marker                          | [87]  |
| 8-OHdG          | BL   | CD      | 25 aCD (HBI≥5)→19 rCD <sup>3</sup> ; 20 iCD; HC   | ↑ in aCD, iCD, and rCD vs. HC                                                                        | CD marker                           | [36]  |
| 8-OHdG          | T-I  | UC      | 16 aUC; 14 UC+N (9 D, 14 UCAC); 17 NM             | ↑ in aUC and UC+N vs. NM                                                                             | Inflam./N                           | [30]  |
| 8-OHdG          | BL   | IBD     | 51 IBD (ns); 67 AD (90% tubulare); 136 CRC; 79 HC | ↑ in IBD vs. AD and CRC and HC                                                                       | IBD marker<br>Diff <sub>IBD/N</sub> | [89]  |
| εdA             | T-H  | UC, CD  | 5 CD (ns); 5 UC (ns); NM                          | ↓ in UC vs. NM;<br>Tended to be ↑ in CD vs. NM                                                       | UC presence                         | [103] |
| εdC             | T-H  | UC, CD  | 5 CD (ns); 5 UC (ns); NM                          | ↑ in UC vs. NM; ↑ in CD vs. NM                                                                       | IBD marker                          | [103] |
| DNA ssb (comet) | BL   | UC      | 20 UC (11/RI, ns); 20 HC                          | ↑ in UC; n/a with activity; CRP 0.54; ESR 0.73                                                       | UC marker                           | [23]  |
| DNA ssb (comet) | BLy  | CD      | 21 pediatric CD (ns/PCDAI, ns); 11 HC             | No association                                                                                       | none                                | [35]  |
| DNA ssb (comet) | PBMC | CD, UC  | 221 CD (ns); 123 UC (ns); 294 HC                  | ↑ in CD and UC vs. HC; ↑ in UC vs. CD                                                                | IBD marker<br>Diff <sub>CD/UC</sub> | [71]  |

<sup>1</sup>, number of patients (number of patients with active disease/scoring system ≥ cut-off for active disease); <sup>2</sup>, data presented as ↑ increased or ↓ decreased levels between indicated groups and as correlation coefficients preceded by the variable; <sup>3</sup>, patients with active disease were followed until they have achieved remission; ns, not specified; n/a, no association; inflam., inflamed; 8-OHdG, 8-oxo-2'-deoxyguanosine; εdA, 1,N6-ethenodeoxyadenosine (HNE-derived etheno-DNA adduct); εdC, 3,N4-ethenodeoxycytidine (HNE-derived etheno-DNA adduct); DNA ssb, single strands breaks in DNA determined with comet assay; HS, healthy controls; CD, Crohn's disease; UC, ulcerative colitis; IBD, inflammatory bowel diseases; iIBD, inactive IBD; aIBD, active IBD; aCD, active CD; iCD, inactive CD; rCD, remission CD; aUC, active UC; iUC, inactive UC; N, neoplasms; D, dysplasia; NM, normal mucosa; UCAC, UC-associated cancer; AD, adenoma; CRC, colorectal cancer; GIS, non-IBD patients with gastrointestinal symptoms; MI, mucosal inflammation; Diff<sub>CD/UC</sub>; differential marker for CD and UC; Diff<sub>IBD/N</sub>; differential marker for IBD and neoplastic diseases (CRC and adenomas); ST, steroids; IS, immunosuppressants; 5'-ASA, 5-aminosalicylic acid; CDAI, Crohn's disease activity index, PCDAI, pediatric Crohn's disease activity index; RI, Rachmilewitz index; HBI, Harvey-Bradshaw index; PTI, Powell-Tuck index; CRP, C-reactive protein; ESR, erythrocyte sedimentation rate; BL, blood-based marker determined in leukocytes; BLy, blood-based

marker determined in lymphocytes; T-H, tissue-based marker determined in homogenates; T-I, tissue-based marker determined with immunohistochemistry (IHC); PBMC, peripheral blood mononuclear cells.
